# Supplementary material for: Erythropoietin enhances hippocampal long-term potentiation and memory
Source: PubMed Central journal article supplement (PMC2562991; doi:10.1186/1741-7007-6-37), 2008-09-09
Supplement: 1741-7007-6-37-S3.pdf [file 1741-7007-6-37-S3.pdf]

### Additional file 3

Spike-rate (1/s)

|         | week 3      | week 4      | week 5      | week 6      | week 7      |
|---------|-------------|-------------|-------------|-------------|-------------|
| EPO     | 42.5 ± 43.7 | 58.5 ± 49.1 | 65.3 ± 38.7 | 50.2 ± 17.5 | 49.9 ± 20.5 |
| Control | 43.3 ± 33.5 | 73.1 ± 19.8 | 83.8 ± 43.7 | 92.1 ± 44.2 | 81.9 ± 54.8 |

Spike-rate (1/s) for EPO-treated and control dishes when compared over a whole week. No significant differences were found.
